# Supplementary material for: Thesaurus-based disambiguation of gene symbols
Source: Springer Nature journal article supplement (doi:10.1186/1471-2105-6-149), 2005-06-16

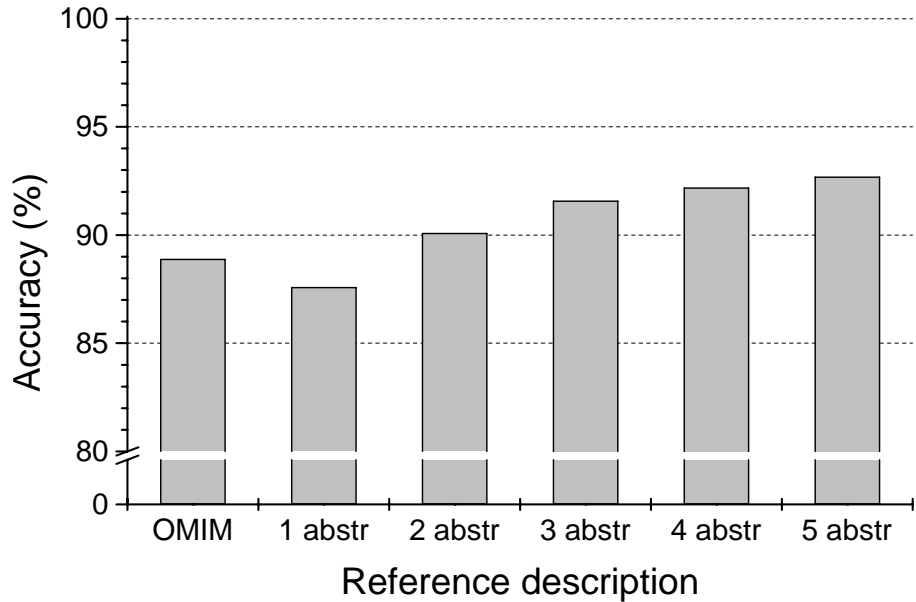

Supplement: 12859_2004_474_MOESM3_ESM.pdf [file 12859_2004_474_MOESM3_ESM.pdf]
